# Supplementary material for: The robustness of individual differences in gaze preferences toward faces and eyes across face-to-face experimental designs and its relation to social anxiety
Source: PubMed Central journal article supplement — J Vis. 2023 May 22;23(5):15. doi: 10.1167/jov.23.5.15 (PMC10210514; doi:10.1167/jov.23.5.15), 2023-05-22
Supplement: jovi-23-5-15_s001.pdf [file jovi-23-5-15_s001.pdf]

1 **The robustness of individual differences in gaze preferences towards faces and eyes across**  
2 **experimental designs and its relation to social anxiety– supplementary materials**

3

4 **Questions of the screen-based scenario:**

5 (The questions were asked in Hebrew, the mother-tongue of the participants.)

- 6 1. Were you born in Israel?
- 7 2. What is your hometown?
- 8 3. What is the name of the last book you read?
- 9 4. When did you read this book?
- 10 5. Do you care about how you are dressed?
- 11 6. Do you often buy clothes?
- 12 7. Do you feel that things do not excite you?
- 13 8. Are you an energetic person?
- 14 9. What things make you feel good?
- 15 10. Is it hard for you to find interest in things?
- 16 11. Are you easily stressed?
- 17 12. Do you adapt easily to new situations?
- 18 13. Do you go to parties often?
- 19 14. Do you go to music shows often?
- 20 15. Do you feel comfortable with yourself?
- 21 16. Do you feel desperate often?
- 22 17. Do you define yourself as an extrovert or an introvert person?
- 23 18. How will your friends define you? as an extrovert or an introvert person?
- 24 19. What is your favorite food?
- 25 20. When was the last time you ate your favorite food?
- 26 21. Have you seen a movie recently?
- 27 22. Have you seen this movie at home or in a cinema?
- 28 23. Do you listen to music often?
- 29 24. Do you hear oriental music?
- 30 25. Do you have a smartphone?
- 31 26. How many posts do you post on Facebook a week?
- 32 27. At what age did you get your own TV?
- 33 28. How many hours a day do you watch TV?

34

35 **Questions of the real-life scenario:**

36 (The questions were asked in Hebrew, the mother-tongue of the participants.)

- 37 1. What is your full name and ID number?
- 38 2. Are you a student at the Hebrew University? What are you studying and in what year are you?
- 39 3. Where do you currently live? How long have you been living there?
- 40 4. Where were you born? Have you lived in other places throughout your life?
- 41 5. What high school did you go to? Where is it located?
- 42 6. What was your primary track in high school? What was your average grade? If you do not
- 43 remember exactly, give an approximation.
- 44 7. What was your SAT score? How many years ago did you do the exam?
- 45 8. Do you have ADHD?
- 46 9. Have you been abroad in the last year? Where?
- 47 10. What is your favorite sport activity? How often do you do it?

48 **Internal consistency of gaze measures for screen-based and live interview scenarios**

49 Internal consistency of each gaze behavior measure (face-preference, eye-preference and eyes-

50 within-face-preference) was examined using a Pearson correlation between two separate sets of data.

51 In the screen-based interview scenario we compared the measures extracted from the first and the

52 second questions of each interviewer. In the live interview, we compared the odd and even questions.

53 All measures were found to be highly reliable (see table S1).

| Scenario                | Eye-preference      | Face-preference     | Eyes-within-face-preference |
|-------------------------|---------------------|---------------------|-----------------------------|
| Screen-based (N = 49)   | r = 0.92, p < 0.001 | r = 0.85, p < 0.001 | r = 0.92, p < 0.001         |
| Live-interview (N = 43) | r = 0.95, p < 0.001 | r = 0.75, p < 0.001 | r = 0.97, p < 0.001         |

54

55 *Table S1: Internal consistency of each measure within each scenario. Each column represents one*

56 *gaze behavior measure. Each row presents the internal consistency in a certain interview scenario.*

57 Face and eyes preferences – Full model results

| Predictors                                              | Face-Preference |                       |                  | Eye-Preference |                      |                  | Eyes-Within-Face-Preference |                      |                  |
|---------------------------------------------------------|-----------------|-----------------------|------------------|----------------|----------------------|------------------|-----------------------------|----------------------|------------------|
|                                                         | Estimates       | CI                    | p                | Estimates      | CI                   | p                | Estimates                   | CI                   | p                |
| (Intercept)                                             | <b>81.16</b>    | <b>78.43 – 83.88</b>  | <b>&lt;0.001</b> | <b>45.14</b>   | <b>38.70 – 51.57</b> | <b>&lt;0.001</b> | <b>54.37</b>                | <b>47.14 – 61.59</b> | <b>&lt;0.001</b> |
| Intearction condition1                                  | 1.62            | -1.18 – 4.42          | 0.255            | -1.07          | -5.51 – 3.37         | 0.635            | -1.74                       | -6.49 – 3.00         | 0.468            |
| Intearction condition2                                  | <b>-7.15</b>    | <b>-10.01 – -4.29</b> | <b>&lt;0.001</b> | 1.95           | -2.53 – 6.43         | 0.391            | <b>6.55</b>                 | <b>1.77 – 11.33</b>  | <b>0.008</b>     |
| Social anxiety trait score                              | <b>-6.08</b>    | <b>-10.07 – -2.10</b> | <b>0.003</b>     | -2.13          | -11.43 – 7.17        | 0.65             | -0.68                       | -11.11 – 9.74        | 0.9              |
| Neuroticism trait score                                 | -2.19           | -6.00 – 1.62          | 0.257            | 6.45           | -2.38 – 15.28        | 0.151            | 8.12                        | -1.77 – 18.02        | 0.107            |
| Autism trait score                                      | 3.51            | 0.24 – 6.78           | 0.036            | 5.32           | -2.26 – 12.90        | 0.167            | 4.91                        | -3.59 – 13.40        | 0.255            |
| Intearction condition1 *<br>Social anxiety trait Score  | 3.8             | -0.34 – 7.94          | 0.072            | 0.27           | -6.39 – 6.93         | 0.94             | -0.85                       | -7.98 – 6.28         | 0.81             |
| Intearction condition2 *<br>Social anxiety trait Score  | -1.19           | -5.45 – 3.07          | 0.58             | -2.68          | -9.38 – 4.02         | 0.43             | -2.7                        | -9.85 – 4.46         | 0.46             |
| Intearction condition1 *<br>Neuroticism trait score     | 1.25            | -2.65 – 5.15          | 0.53             | -2.8           | -9.11 – 3.50         | 0.38             | -3.72                       | -10.47 – 3.03        | 0.28             |
| Intearction condition2 *<br>Neuroticism trait score     | 0.73            | -3.40 – 4.86          | 0.73             | -3.25          | -9.76 – 3.25         | 0.32             | -3.37                       | -10.31 – 3.57        | 0.34             |
| Intearction condition1 *<br>Autism trait score          | -1.03           | -4.85 – 2.80          | 0.6              | 1.48           | -4.75 – 7.71         | 0.64             | 1.78                        | -4.89 – 8.45         | 0.6              |
| Intearction condition2 *<br>Autism trait score          | 1.2             | -2.23 – 4.62          | 0.49             | 0.62           | -4.80 – 6.04         | 0.82             | 0.27                        | -5.51 – 6.06         | 0.93             |
| <b>Random Effects</b>                                   |                 |                       |                  |                |                      |                  |                             |                      |                  |
| ICC                                                     | 0.23            |                       |                  | 0.54           |                      |                  | 0.58                        |                      |                  |
| N                                                       | 50 Participant  |                       |                  | 50 Participant |                      |                  | 50 Participant              |                      |                  |
| Observations                                            | 135             |                       |                  | 135            |                      |                  | 135                         |                      |                  |
| Marginal R <sup>2</sup> /<br>Conditional R <sup>2</sup> | 0.222 / 0.404   |                       |                  | 0.089 / 0.583  |                      |                  | 0.102 / 0.618               |                      |                  |

58

59 *Table S2: Mixture modelling results of gaze preference measures. Significant results appear in bold*  
60 *(p<0.016, after correction for multiple comparisons). The two bottom lines present the number of*  
61 *data points included in the model (~3 for each interaction-condition – screen-based interview and*  
62 *listening and speaking in the live interview), and the marginal R<sup>2</sup> (variance explained by the fixed*  
63 *effects) and conditional R<sup>2</sup> (variance explained by the whole model). Intearction-condition1 reflects a*  
64 *contrast comparing between scenarios (screen-based interview minus the listening stage of the live*

65 *interview*). *Interaction-condition2* reflects a contrast comparing between live interview stages  
66 (*speaking minus listening*).

### 67 **Potential interfering factors face and eye preference**

68 To examine whether the effects shown in the main text are driven by other interfering factors such as  
69 the experimenter identity and the participant sex, we added to the models additional factors to  
70 control these potential interfering factors (dv ~ participant-sex\*experimenter\*interaction-condition +  
71 interaction-condition\*(Social Anxiety + Neuroticism + Autism-like) + (1|Participant)).

72

| <i>Predictors</i>                                               | <b>Face-Preference</b> |                       |                  | <b>Eye-Preference</b> |                       |                  | <b>Eyes-Within-Face-Preference</b> |                      |                  |
|-----------------------------------------------------------------|------------------------|-----------------------|------------------|-----------------------|-----------------------|------------------|------------------------------------|----------------------|------------------|
|                                                                 | <i>Estimates</i>       | <i>CI</i>             | <i>p</i>         | <i>Estimates</i>      | <i>CI</i>             | <i>p</i>         | <i>Estimates</i>                   | <i>CI</i>            | <i>p</i>         |
| <b>(Intercept)</b>                                              | <b>81.69</b>           | <b>78.96 – 84.42</b>  | <b>&lt;0.001</b> | <b>46.44</b>          | <b>39.89 – 53.00</b>  | <b>&lt;0.001</b> | <b>55.8</b>                        | <b>48.34 – 63.27</b> | <b>&lt;0.001</b> |
| Experimenter1                                                   | -3.37                  | -6.20 – -0.54         | 0.02             | -2.22                 | -9.00 – 4.57          | 0.519            | -1.24                              | -8.96 – 6.49         | 0.751            |
| Participant-sex1                                                | -0.1                   | -3.34 – 3.14          | 0.952            | -7.25                 | -15.01 – 0.50         | 0.066            | -8.54                              | -17.36 – 0.29        | 0.058            |
| Intearction-condition1                                          | 1.51                   | -1.38 – 4.40          | 0.303            | -1.29                 | -5.71 – 3.13          | 0.565            | -2.11                              | -6.86 – 2.64         | 0.381            |
| <b>Intearction-condition2</b>                                   | <b>-7.48</b>           | <b>-10.42 – -4.55</b> | <b>&lt;0.001</b> | 1.84                  | -2.61 – 6.29          | 0.414            | <b>6.76</b>                        | <b>1.98 – 11.54</b>  | <b>0.006</b>     |
| <b>Social anxiety trait score</b>                               | <b>-6.59</b>           | <b>-10.55 – -2.64</b> | <b>0.001</b>     | -1.57                 | -10.93 – 7.79         | 0.74             | 0.36                               | -10.28 – 11.00       | 0.947            |
| Neuroticism trait score                                         | -1.77                  | -5.72 – 2.18          | 0.377            | 3.29                  | -5.92 – 12.49         | 0.481            | 4.32                               | -6.13 – 14.77        | 0.415            |
| Autism trait score                                              | 3.94                   | 0.62 – 7.26           | 0.02             | 5.55                  | -2.22 – 13.32         | 0.16             | 4.56                               | -4.27 – 13.39        | 0.309            |
| Experimenter1 *<br>Participant-sex1                             | 0.7                    | -2.12 – 3.51          | 0.625            | 6.54                  | -0.22 – 13.31         | 0.058            | 6.02                               | -1.68 – 13.73        | 0.124            |
| Experimenter1 *<br>Intearction-condition1                       | 2.16                   | -0.83 – 5.14          | 0.156            | -0.38                 | -4.96 – 4.21          | 0.871            | -1.54                              | -6.47 – 3.40         | 0.538            |
| Experimenter1 *<br>Intearction-condition2                       | 1.72                   | -1.35 – 4.78          | 0.269            | 0.89                  | -3.75 – 5.54          | 0.703            | -0.18                              | -5.17 – 4.81         | 0.943            |
| Participant-sex1 *<br>Intearction-condition1                    | -0.27                  | -3.67 – 3.14          | 0.877            | 4.78                  | -0.45 – 10.01         | 0.073            | 6.05                               | 0.42 – 11.68         | 0.036            |
| Participant-sex1 *<br>Intearction-condition2                    | -0.6                   | -4.11 – 2.91          | 0.737            | -0.55                 | -5.87 – 4.77          | 0.838            | -1.04                              | -6.76 – 4.67         | 0.718            |
| Intearction-condition1 *<br>Social anxiety trait score          | 4.3                    | 0.09 – 8.51           | 0.046            | 0.04                  | -6.52 – 6.59          | 0.991            | -1.58                              | -8.64 – 5.48         | 0.659            |
| Intearction-condition2 *<br>Social anxiety trait score          | -1.01                  | -5.35 – 3.33          | 0.646            | -2.52                 | -9.12 – 4.08          | 0.451            | -2.54                              | -9.63 – 4.55         | 0.479            |
| Intearction-condition1 *<br>Neuroticism trait score             | 0.9                    | -3.24 – 5.04          | 0.669            | -0.24                 | -6.75 – 6.28          | 0.943            | -0.56                              | -7.58 – 6.46         | 0.875            |
| Intearction-condition2 *<br>Neuroticism trait score             | 0.09                   | -4.34 – 4.51          | 0.968            | -3.65                 | -10.39 – 3.09         | 0.286            | -3.74                              | -10.99 – 3.50        | 0.308            |
| Intearction-condition1 *<br>Autism trait score                  | -1.62                  | -5.55 – 2.30          | 0.414            | 0.72                  | -5.47 – 6.90          | 0.818            | 1.57                               | -5.10 – 8.24         | 0.642            |
| Intearction-condition2 *<br>Autism trait score                  | 1.38                   | -2.21 – 4.97          | 0.448            | 0.58                  | -4.91 – 6.07          | 0.835            | 0.1                                | -5.80 – 6.00         | 0.972            |
| Experimenter1 *<br>Participant-sex1 *<br>Intearction-condition1 | -1.29                  | -4.25 – 1.67          | 0.389            | <b>-6.33</b>          | <b>-10.86 – -1.79</b> | <b>0.007</b>     | -5.37                              | -10.25 – -0.50       | 0.031            |
| Experimenter1 *<br>Participant-sex1 *<br>Intearction-condition2 | 1.62                   | -1.42 – 4.65          | 0.293            | 0.39                  | -4.20 – 4.98          | 0.866            | -0.15                              | -5.08 – 4.78         | 0.952            |
| <b>Random Effects</b>                                           |                        |                       |                  |                       |                       |                  |                                    |                      |                  |
| ICC                                                             | 0.21                   |                       |                  | 0.55                  |                       |                  | 0.59                               |                      |                  |
| N                                                               | 50 Participant         |                       |                  | 50 Participant        |                       |                  | 50 Participant                     |                      |                  |
| Observations                                                    | 135                    |                       |                  | 135                   |                       |                  | 135                                |                      |                  |
| Marginal R <sup>2</sup> /<br>Conditional R <sup>2</sup>         | 0.287 / 0.436          |                       |                  | 0.193 / 0.638         |                       |                  | 0.187 / 0.665                      |                      |                  |

74 *Table S3: **Statistics for real-life models, one for each gaze behavior measure.** Significant results*  
75 *appear in bold. The two bottom lines present the number of data points included in the model (~3 for*  
76 *each interaction-condition – screen-based interview and listening and speaking in the live interview),*  
77 *and the marginal  $R^2$  (variance explained by the fixed effects) and conditional  $R^2$  (variance explained*  
78 *by the whole model). Interaction-condition1 reflects a contrast comparing between scenarios (screen-*  
79 *based interview minus the listening stage of the live interview). Interaction-condition2 reflects a*  
80 *contrast comparing between live interview stages (speaking minus listening).*

81

82 The models when considering the experimenter and the participant-sex revealed similar results in the  
83 face-preference model – significant effect of social anxiety and a significant difference between  
84 speaking and listening stages in the live interview scenario. However, in the eyes-within-face-  
85 preference the influence of the neuroticism trait score did not remain significant when correcting for  
86 multiple comparisons.

87

### 88 **Internal consistency reliability, stability and validity of mouth preference**

89 Our study focused on preference to look at the eyes and face regions, measures that were chosen  
90 before running the experiment. However, in order to get a complete picture of the main facial  
91 features, we also examined the mouth-preference (percent of fixation time in the mouth region) and  
92 mouth-within-face-preference (percent of fixation time in the mouth region out of the total time in  
93 the face region). The analysis procedure was similar to that of the eye and face preferences described  
94 in the main text.

95 Mouth-preference and mouth-within-face-preference exhibit high internal consistency in the screen-  
96 based interview scenario (mouth-preference:  $r = 0.93$ ,  $p < 0.001$ ; mouth-preference-within-face:  $r =$   
97  $0.93$ ,  $p < 0.001$ ) and in the live interview scenario (mouth-preference:  $r = 0.93$ ,  $p < 0.001$  ; mouth-  
98 preference-within-face:  $r = 0.97$ ,  $p < 0.001$ ).

99

100 Both mouth-preference and mouth-within-face-preference were significantly correlated across  
 101 scenarios (see table S3).

| <i>Stability across tasks</i>                      | Mouth-preference       | Mouth-within-face-preference |
|----------------------------------------------------|------------------------|------------------------------|
| Screen-based <-> live interview – Listening (N=42) | r = 0.4,<br>p = 0.009  | r = 0.46,<br>p = 0.002       |
| Screen-based <-> live interview – Speaking (N=42)  | r = 0.36,<br>p = 0.02  | r = 0.48,<br>p = 0.001       |
| live interview – Speaking <-> Listening (N=43)     | r = 0.76,<br>p < 0.001 | r = 0.8,<br>p < 0.001        |

102

103 *Table S4: Cross-scenario correlations of mouth-preference and mouth-within-face-preference. Each*  
 104 *column reflects correlation of one mouth-related gaze behavior measure. Each row presents the*  
 105 *correlation between two scenarios.*

106

107 Linear mixed models were performed in order to examine the relation between individuals’ traits and  
 108 their mouth preference. Similar to the main text, we first examine a model without potential  
 109 confounds and then added them. The first model revealed three significant effects (same for both  
 110 mouth-preference and mouth-within-face-preference): 1) A significant difference between screen-  
 111 based and live interview scenario – participants look at the mouth region more in the screen-based  
 112 interview scenario compared to the listening stage of the live interview scenario. 2) A significant  
 113 difference between listening and speaking stages in the live interview scenario – participants look  
 114 more at the mouth region while listening compared speaking. 3) A significant effect of neuroticism,  
 115 suggesting that more neurotic participants look more at the companion’s mouth. In the model that  
 116 include potential confounds (participant-sex and experimenter identity), the effect of neuroticism was  
 117 not significant when correcting for multiple comparisons (p = 0.037 for mouth-preference and p = 0.05  
 118 for mouth-within-face-preference).

119

| <i>Predictors</i>                                       | <b>Mouth-Preference</b> |               |                  | <b>Mouth-Within-Face-Preference</b> |                |                  |
|---------------------------------------------------------|-------------------------|---------------|------------------|-------------------------------------|----------------|------------------|
|                                                         | <i>Estimates</i>        | <i>CI</i>     | <i>p</i>         | <i>Estimate<sub>s</sub></i>         | <i>CI</i>      | <i>p</i>         |
| (Intercept)                                             | 15.1                    | 11.12 – 19.08 | <b>&lt;0.001</b> | 18.46                               | 13.46 – 23.46  | <b>&lt;0.001</b> |
| Intearction-condition1                                  | 4.87                    | 1.83 – 7.91   | <b>0.002</b>     | 5.9                                 | 2.55 – 9.26    | <b>0.001</b>     |
| Intearction-condition2                                  | -6.8                    | -9.87 – -3.72 | <b>&lt;0.001</b> | -6.82                               | -10.20 – -3.44 | <b>&lt;0.001</b> |
| Social anxiety trait score                              | -3.21                   | -8.97 – 2.56  | 0.27             | -2.89                               | -10.11 – 4.33  | 0.43             |
| Neuroticism trait score                                 | 8.45                    | 2.96 – 13.94  | <b>0.003</b>     | 9.9                                 | 3.05 – 16.75   | <b>0.005</b>     |
| Autism trait score                                      | -2.48                   | -7.18 – 2.23  | 0.299            | -3.49                               | -9.37 – 2.40   | 0.243            |
| Intearction-condition1 *<br>Social anxiety trait score  | 3.22                    | -1.32 – 7.77  | 0.16             | 4.22                                | -0.82 – 9.25   | 0.1              |
| Intearction-condition2 *<br>Social anxiety trait score  | 0.18                    | -4.42 – 4.78  | 0.94             | -0.75                               | -5.82 – 4.31   | 0.77             |
| Intearction-condition1 *<br>Neuroticism trait score     | -2.25                   | -6.55 – 2.05  | 0.3              | -2.93                               | -7.70 – 1.84   | 0.23             |
| Intearction-condition2 *<br>Neuroticism trait score     | -3.17                   | -7.63 – 1.29  | 0.16             | -2.14                               | -7.05 – 2.77   | 0.39             |
| Intearction-condition1 *<br>Autism trait score          | -1.69                   | -5.93 – 2.55  | 0.43             | -2.71                               | -7.42 – 2.00   | 0.26             |
| Intearction-condition2 *<br>Autism trait score          | 0.02                    | -3.69 – 3.73  | 0.99             | 0.28                                | -3.82 – 4.37   | 0.89             |
| <b>Random Effects</b>                                   |                         |               |                  |                                     |                |                  |
| ICC                                                     | 0.47                    |               |                  | 0.56                                |                |                  |
| N                                                       | 50 Participant          |               |                  | 50 Participant                      |                |                  |
| Observations                                            | 135                     |               |                  | 135                                 |                |                  |
| Marginal R <sup>2</sup> /<br>Conditional R <sup>2</sup> | 0.204 / 0.578           |               |                  | 0.188 / 0.643                       |                |                  |

121 *Table S5: Statistics for mouth preferences measures. The model of mouth-preference appears on the*  
122 *left column and the mouth-within-face-preference on the right column. Significant results appear in*  
123 *bold. The two bottom lines present the number of data points included in the model (~3 for each*  
124 *interaction-condition – screen-based interview and listening and speaking in the live interview), and*  
125 *the marginal R<sup>2</sup> (variance explained by the fixed effects) and conditional R<sup>2</sup> (variance explained by*  
126 *the whole model). Interaction-condition1 reflects a contrast between scenarios (screen-based*  
127 *interview minus the listening stage of the live interview). Interaction-condition2 reflects a contrast*  
128 *between live interview stages (speaking minus listening).*
